WITHDRAWN ARTICLE

## WITHDRAWN: Epithelial to Mesenchymal Transition (EMT) Regulated by MicroRNA-429 in Pancreatic Ductal Adenocarcinoma (PDAC)

Gang Zheng; Zhigang Wang; Jie Tang; Yin Sun; Zhou Hu; Huiping Chen

*Biosci Rep* (2021) BSR20203360; **DOI:** 10.1042/BSR20203360

The Accepted Manuscript version of this article (published on 18 January 2021) was withdrawn on 29 January 2021 due to concerns over authorship.
